# Supplementary material for: Femoral Adipose Tissue May Accumulate the Fat That Has Been Recycled as VLDL and Nonesterified Fatty Acids
Source: PubMed Central journal article supplement — Diabetes. 2010 Aug 3;59(10):2465–73. doi: 10.2337/db10-0678 (PMC3279526; doi:10.2337/db10-0678), 2010-08-03
Supplement: supp_db10-0678_db100678onlineappendix.pdf [file supp_db10-0678_db100678onlineappendix.pdf]

## ONLINE SUPPLEMENTARY INFORMATION

**SUPPLEMENTARY TABLE 1.** Metabolic responses calculated on a whole-depot basis

| Variable          | Abdominal  | Femoral   | P     |
|-------------------|------------|-----------|-------|
| Net NEFA release  | 31.6 ± 6.2 | 7.4 ± 2.7 | 0.018 |
| Net TG extraction | 10.6 ± 3.6 | 2.2 ± 0.6 | 0.028 |

P-values refer to the difference between depots, by Wilcoxon signed-ranks test.

Units are mmol/depot over the 6 h postprandial period, expressed as mean ± SEM,  $n=7$ . They are calculated as area-under-curve for the period 0 – 360 min for each metabolic variable multiplied by the respective depot fat mass.

Depot fat masses were measured by DXA (Lunar iDXA, GE Healthcare, Chalfont St Giles, UK). For 'abdominal' the value for 'trunk' was used, for femoral the values for 'legs' was used.
